# Supplementary material
Source: PubMed Central journal article supplement (PMC4788169)
Supplement: jolk895201.ww1_default.pdf [file jolk895201.ww1_default.pdf]

**Appendix 1: Differences in weight-loss at programme end and one year follow-up between intervention groups and comparator arm (exercise-only) with imputation of missing data using last recorded value carried forwards**

|                  | Programme end               |         |                                                      |         | One year                    |         |                                                      |            |
|------------------|-----------------------------|---------|------------------------------------------------------|---------|-----------------------------|---------|------------------------------------------------------|------------|
|                  | Mean difference<br>(95% CI) | p value | Adjusted mean<br>difference <sup>1</sup><br>(95% CI) | p value | Mean difference<br>(95% CI) | p value | Adjusted mean<br>difference <sup>1</sup><br>(95% CI) | p<br>value |
| Weight Watchers  | -2.84 (-4.05 to -1.62)      | <0.001  | -2.78 (-4.03 to -1.54)                               | <0.001  | -3.02 (-4.73 to -1.32)      | <0.001  | -3.21 (-4.98 to -1.45)                               | 0.003      |
| Slimming World   | -1.88 (-3.10 to -0.67)      | 0.017   | -1.57 (-2.83 to -0.32)                               | 0.098   | -1.94 (-3.65 to -0.24)      | 0.025   | -2.06 (-3.84 to -0.28)                               | 0.165      |
| Rosemary Conley  | -2.49 (-3.71 to -1.28)      | <0.001  | -2.67 (-3.93 to -1.41)                               | <0.001  | -1.84 (-3.54 to -0.13)      | 0.035   | -2.28 (-4.06 to -0.50)                               | 0.087      |
| NHS Size Down    | -0.50 (-1.72 to 0.72)       | 1.000   | -0.20 (-1.46 to 1.06)                                | 1.000   | -1.77 (-3.48 to -0.07)      | 0.042   | -1.95 (-3.74 to -0.16)                               | 0.228      |
| General Practice | 0.74 (-0.60 to 2.08)        | 1.000   | 0.70 (-0.68 to 2.08)                                 | 1.000   | 0.20 (-1.68 to 2.08)        | 0.838   | -0.30 (-2.26 to 1.66)                                | 1.000      |
| Pharmacy         | -0.27 (-1.60 to 1.07)       | 1.000   | -0.28 (-1.70 to 1.41)                                | 1.000   | -0.52 (-2.40 to 1.36)       | 0.589   | -0.94 (-2.96 to 1.08)                                | 1.000      |
| Choice           | -1.69 (-2.90 to -0.47)      | 0.046   | -1.71 (-2.96 to -0.46)                               | 0.052   | -1.63 (-3.34 to 0.07)       | 0.050   | -2.08 (-3.85 to -0.30)                               | 0.152      |

<sup>1</sup> adjusted for weight at baseline, physical activity at baseline, age, gender and ethnic group

Negative difference favours the intervention arm

The P-values have been adjusted to maintain an overall 5% Type 1 error rate across the seven comparisons, but the 95% confidence intervals are not adjusted
